# Supplementary material for: iLOCi: a SNP interaction prioritization technique for detecting epistasis in genome-wide association studies
Source: PubMed Central journal article supplement (PMC3521387; doi:10.1186/1471-2164-13-s7-s2), 2012-12-07
Supplement: 1471-2164-13-S7-S2-S1.pdf [file 1471-2164-13-S7-S2-S1.pdf]

## The mathematical relationship between $\rho_{\text{diff}}$ value calculated using genotype information and LD calculated from allelic information

Let  $a$  and  $b$  be random variables for allele from loci  $A$  and  $B$  where  $a \in \{-1, 1\}$  and  $b \in \{-1, 1\}$  and the observed haplotype frequency is shown in Table 1.

Table 1: Two haplotype observed frequency

|       | $A_1$    | $A_2$    |
|-------|----------|----------|
| $B_2$ | $x_{21}$ | $x_{22}$ |

We denote allele frequency from loci  $A$  and  $B$  as in Table 2.

Table 2: Estimated allele frequency

| $A_1$ | $A_2$ | $B_1$ | $B_2$ |
|-------|-------|-------|-------|
| $p_1$ | $p_2$ | $q_1$ | $q_2$ |

Given that the loci  $A$  and  $B$  are independent, expected haplotype frequency is determined by

$$x_{11} = p_1 q_1$$

$$x_{12} = p_1 q_2$$

$$x_{21} = p_2 q_1$$

$$x_{22} = p_2 q_2$$

Linkage disequilibrium (LD) is defined as the deviation of the expected haplotype frequency and the definition of LD is given in Table 3.

Table 3: Two observed haplotype frequency

|       | $A_1$                  | $A_2$                  |
|-------|------------------------|------------------------|
| $B_1$ | $x_{11} = p_1 q_1 + D$ | $x_{12} = p_1 q_2 - D$ |
| $B_2$ | $x_{21} = p_2 q_1 - D$ | $x_{22} = p_2 q_2 + D$ |

Let us compute the covariance of haplotype from two locus. The covariance is defined by

$$Cov(a, b) = E[ab] - E[a]E[b]$$

From Table 1,  $E[ab]$  calculation is shown in the following equation:

$$\begin{aligned} E[ab] &= -1 \times -1 \times x_{11} + -1 \times 1 \times x_{21} + 1 \times -1 \times x_{12} + 1 \times 1 \times x_{22} \\ &= x_{11} - x_{21} - x_{12} + x_{22} \end{aligned}$$

and  $E[a]E[b]$  is given by

$$\begin{aligned} E[a]E[b] &= (-1 \times p_1 + 1 \times p_2)(-1 \times q_1 + 1 \times q_2) \\ &= p_1 q_1 - p_1 q_2 - p_2 q_1 + p_2 q_2 \end{aligned}$$

It follows that the haplotype covariance is

$$\begin{aligned} E[ab] - E[a]E[b] &= x_{11} - x_{21} - x_{12} + x_{22} - (p_1 q_1 - p_1 q_2 - p_2 q_1 + p_2 q_2) \\ &= (x_{11} - p_1 q_1) - (x_{21} - p_2 q_1) - (x_{12} - p_1 q_2) + (x_{22} - p_2 q_2) \end{aligned}$$

From the relationship between observed haplotype frequency and LD in Table 3, we have

$$\begin{aligned} E[ab] - E[a]E[b] &= (x_{11} - p_1 q_1) - (x_{21} - p_2 q_1) - (x_{12} - p_1 q_2) + (x_{22} - p_2 q_2) \\ &= D - (-D) - (-D) + D \\ &= 4D \end{aligned}$$

which is the relationship between covariance and LD.

Next, we consider genotype correlation. Let  $S_1$  and  $S_2$  be random variables of SNP1 and SNP2 respectively with the values of  $S_1 \in \{-1, 0, 1\}$  and  $S_2 \in \{-1, 0, 1\}$ . The observed genotype frequency is given Table 4.

Table 4: Genotype observed frequency

|          | $A_1A_1$ | $A_1A_2$ | $A_2A_2$ |
|----------|----------|----------|----------|
| $B_1B_2$ | $f_{21}$ | $f_{22}$ | $f_{23}$ |
| $B_2B_2$ | $f_{31}$ | $f_{32}$ | $f_{33}$ |

If two genotype locus are independent, the expected frequencies are given in Table 5.

Table 5: Genotype expected frequency

|          | $A_1A_1$       | $A_1A_2$        | $A_2A_2$       |
|----------|----------------|-----------------|----------------|
| $B_1B_1$ | $p_1^2q_1^2$   | $2p_1q_1^2$     | $p_2^2q_2^2$   |
| $B_1B_2$ | $2p_1^2p_1q_1$ | $4p_1p_2q_1q_2$ | $2p_2^2q_1q_2$ |
| $B_2B_2$ | $p_1^2q_2^2$   | $2p_1p_2q_2^2$  | $p_2^2q_2^2$   |

Since  $S_1, S_2 \in \{-1, 0, 1\}$ , the covariance of two SNPs is computed by

$$\begin{aligned} E[S_1S_2] &= -1 \times -1 \times f_{11} + -1 \times 1 \times f_{13} + 1 \times -1 \times f_{31} + 1 \times 1 \times f_{33} \\ &= f_{11} - f_{13} - f_{31} + f_{33} \end{aligned}$$

and

$$\begin{aligned} E[S_1]E[S_2] &= (-1 \times p_1^2 + 1 \times p_2^2)(-1 \times q_1^2 + 1 \times q_2^2) \\ &= p_1^2q_1^2 - p_2^2q_1^2 - p_1^2q_2^2 + p_2^2q_2^2 \end{aligned}$$

and, hence

$$\begin{aligned} E[S_1S_2] - E[S_1]E[S_2] &= f_{11} - f_{13} - f_{31} + f_{33} - (p_1^2q_1^2 - p_2^2q_1^2 - p_1^2q_2^2 + p_2^2q_2^2) \\ &= (f_{11} - p_1^2q_1^2) - (f_{13} - p_2^2q_1^2) - (f_{31} - p_1^2q_2^2) + (f_{33} - p_2^2q_2^2) \end{aligned}$$

Again, using the relationship in Table 3, we have

$$\begin{aligned} E[S_1S_2] - E[S_1]E[S_2] &= \\ &= (f_{11} - (x_{11} - D)^2) - (f_{13} - (x_{12} + D)^2) - (f_{31} - (x_{21} + D)^2) + (f_{33} - (x_{22} - D)^2) \end{aligned}$$

In conclusion, we have shown that the relationship between LD and correlation between haplotype of two locus is given by

$$\boxed{Cov[ab] = 4D}$$

Moreover, there is a relationship between covariance of two SNPs with  $\{-1, 0, 1\}$  representation and LD as shown in the following equation.

$$\boxed{Cov[S_1S_2] = (f_{11} - (x_{11} - D)^2) - (f_{13} - (x_{12} + D)^2) - (f_{31} - (x_{21} + D)^2) + (f_{33} - (x_{22} - D)^2)}$$
