# Supplementary material for: iLOCi: a SNP interaction prioritization technique for detecting epistasis in genome-wide association studies
Source: PubMed Central journal article supplement (PMC3521387; doi:10.1186/1471-2164-13-s7-s2), 2012-12-07
Supplement: 1471-2164-13-S7-S2-S2.pdf [file 1471-2164-13-S7-S2-S2.pdf]

**Table S1 - Eighteen penetrance models of epistatic interactions without marginal effect**

| $h^2 = 0.4, \text{MAF} = 0.2$ |       |       |       |
|-------------------------------|-------|-------|-------|
| model 1                       | AA    | Aa    | aa    |
| BB                            | 0.486 | 0.960 | 0.538 |
| Bb                            | 0.947 | 0.004 | 0.811 |
| Bb                            | 0.640 | 0.606 | 0.909 |
| model 2                       | AA    | Aa    | aa    |
| BB                            | 0.469 | 0.956 | 0.697 |
| Bb                            | 0.945 | 0.019 | 0.585 |
| Bb                            | 0.786 | 0.407 | 0.013 |
| model 3                       | AA    | Aa    | aa    |
| BB                            | 0.498 | 0.954 | 0.786 |
| Bb                            | 0.978 | 0.038 | 0.428 |
| Bb                            | 0.590 | 0.821 | 0.380 |

| $h^2 = 0.4, \text{MAF} = 0.4$ |       |       |       |
|-------------------------------|-------|-------|-------|
| model 4                       | AA    | Aa    | aa    |
| BB                            | 0.077 | 0.656 | 0.880 |
| Bb                            | 0.892 | 0.235 | 0.312 |
| bb                            | 0.174 | 0.842 | 0.106 |
| model 5                       | AA    | Aa    | aa    |
| BB                            | 0.895 | 0.323 | 0.161 |
| Bb                            | 0.068 | 0.728 | 0.806 |
| bb                            | 0.925 | 0.233 | 0.362 |
| model 6                       | AA    | Aa    | aa    |
| BB                            | 0.805 | 0.251 | 0.085 |
| Bb                            | 0.002 | 0.668 | 0.638 |
| bb                            | 0.83  | 0.079 | 0.542 |

| $h^2 = 0.3, \text{MAF} = 0.2$ |       |       |       |
|-------------------------------|-------|-------|-------|
| model 7                       | AA    | Aa    | aa    |
| BB                            | 0.500 | 0.926 | 0.615 |
| Bb                            | 0.895 | 0.131 | 0.647 |
| Bb                            | 0.858 | 0.160 | 0.999 |
| model 8                       | AA    | Aa    | aa    |
| BB                            | 0.413 | 0.851 | 0.535 |
| Bb                            | 0.831 | 0.008 | 0.580 |
| Bb                            | 0.692 | 0.268 | 0.736 |
| model 9                       | AA    | Aa    | aa    |
| BB                            | 0.455 | 0.848 | 0.897 |
| Bb                            | 0.890 | 0.088 | 0.016 |
| Bb                            | 0.562 | 0.686 | 0.467 |

| $h^2 = 0.3, \text{MAF} = 0.4$ |       |       |       |
|-------------------------------|-------|-------|-------|
| model 10                      | AA    | Aa    | aa    |
| BB                            | 0.891 | 0.362 | 0.480 |
| Bb                            | 0.213 | 0.829 | 0.601 |
| bb                            | 0.925 | 0.267 | 0.685 |
| model 11                      | AA    | Aa    | aa    |
| BB                            | 0.077 | 0.689 | 0.417 |
| Bb                            | 0.763 | 0.150 | 0.491 |
| bb                            | 0.196 | 0.657 | 0.247 |
| model 12                      | AA    | Aa    | aa    |
| BB                            | 0.091 | 0.827 | 0.863 |
| Bb                            | 0.869 | 0.393 | 0.415 |
| bb                            | 0.738 | 0.508 | 0.363 |

| $h^2 = 0.2, \text{MAF} = 0.2$ |       |       |       |
|-------------------------------|-------|-------|-------|
| model 13                      | AA    | Aa    | aa    |
| BB                            | 0.428 | 0.757 | 0.812 |
| Bb                            | 0.788 | 0.132 | 0.044 |
| Bb                            | 0.559 | 0.548 | 0.373 |
| model 14                      | AA    | Aa    | aa    |
| BB                            | 0.507 | 0.842 | 0.605 |
| Bb                            | 0.845 | 0.162 | 0.629 |
| Bb                            | 0.581 | 0.678 | 0.729 |
| model 15                      | AA    | Aa    | aa    |
| BB                            | 0.577 | 0.247 | 0.428 |
| Bb                            | 0.227 | 0.928 | 0.578 |
| Bb                            | 0.586 | 0.262 | 0.158 |

| $h^2 = 0.2, \text{MAF} = 0.4$ |       |       |       |
|-------------------------------|-------|-------|-------|
| model 16                      | AA    | Aa    | aa    |
| BB                            | 0.356 | 0.891 | 0.809 |
| Bb                            | 0.955 | 0.508 | 0.611 |
| bb                            | 0.617 | 0.755 | 0.630 |
| model 17                      | AA    | Aa    | aa    |
| BB                            | 0.085 | 0.339 | 0.772 |
| Bb                            | 0.513 | 0.651 | 0.607 |
| bb                            | 0.250 | 0.999 | 0.154 |
| model 18                      | AA    | Aa    | aa    |
| BB                            | 0.393 | 0.764 | 0.664 |
| Bb                            | 0.850 | 0.398 | 0.733 |
| bb                            | 0.406 | 0.927 | 0.147 |

**Table S2 - Penetrance models of epistatic interactions with marginal effect**

**(Moore et al. 2002)**

| model 1 | AA    | Aa    | aa    |
|---------|-------|-------|-------|
| BB      | 0.083 | 0.076 | 0.964 |
| Bb      | 0.056 | 0.508 | 0.085 |
| Bb      | 0.977 | 0.098 | 0.062 |
| model 2 | AA    | Aa    | aa    |
| BB      | 0.094 | 0.905 | 0.097 |
| Bb      | 0.967 | 0.097 | 0.937 |
| Bb      | 0.027 | 0.990 | 0.080 |
| model 3 | AA    | Aa    | aa    |
| BB      | 0.967 | 0.314 | 0.137 |
| Bb      | 0.313 | 0.312 | 0.742 |
| Bb      | 0.129 | 0.779 | 0.075 |

| model 4 | AA    | Aa    | aa    |
|---------|-------|-------|-------|
| BB      | 0.967 | 0.139 | 0.799 |
| Bb      | 0.057 | 0.655 | 0.627 |
| Bb      | 0.974 | 0.544 | 0.019 |
| model 5 | AA    | Aa    | aa    |
| BB      | 0.017 | 0.451 | 0.711 |
| Bb      | 0.520 | 0.571 | 0.039 |
| Bb      | 0.640 | 0.053 | 0.949 |
| model 6 | AA    | Aa    | aa    |
| BB      | 0.954 | 0.256 | 0.360 |
| Bb      | 0.010 | 0.731 | 0.300 |
| Bb      | 0.801 | 0.093 | 0.808 |

**Table S3 - Penetrance models of two-locus interactions from Neuman and Rice**

**1992 used for generation of high-order interaction models**

|     |       |       |       |      |       |       |       |
|-----|-------|-------|-------|------|-------|-------|-------|
| Ep1 | AA    | Aa    | aa    | Het1 | AA    | Aa    | aa    |
| BB  | 0.707 | 0.707 | 0.000 | BB   | 0.745 | 0.745 | 0.495 |
| Bb  | 0.707 | 0.707 | 0.000 | Bb   | 0.745 | 0.745 | 0.495 |
| Bb  | 0.000 | 0.000 | 0.000 | bb   | 0.495 | 0.495 | 0.000 |
| Ep3 | AA    | Aa    | aa    | Het3 | AA    | Aa    | aa    |
| BB  | 0.900 | 0.000 | 0.000 | BB   | 1.000 | 1.000 | 1.000 |
| Bb  | 0.000 | 0.000 | 0.000 | Bb   | 1.000 | 0.000 | 0.000 |
| Bb  | 0.000 | 0.000 | 0.000 | bb   | 1.000 | 0.000 | 0.000 |
| Ep5 | AA    | Aa    | aa    | S1   | AA    | Aa    | aa    |
| BB  | 0.799 | 0.799 | 0.000 | BB   | 0.522 | 0.522 | 0.522 |
| Bb  | 0.799 | 0.000 | 0.000 | Bb   | 0.522 | 0.522 | 0.522 |
| Bb  | 0.000 | 0.000 | 0.000 | bb   | 0.522 | 0.522 | 0.000 |
| Ep6 | AA    | Aa    | aa    | S3   | AA    | Aa    | aa    |
| BB  | 0.000 | 1.000 | 1.000 | BB   | 1.000 | 1.000 | 0.512 |
| Bb  | 1.000 | 0.000 | 0.000 | Bb   | 1.000 | 0.512 | 0.000 |
| Bb  | 1.000 | 0.000 | 0.000 | bb   | 0.512 | 0.000 | 0.000 |
